# Supplementary material
Source: PubMed Central journal article supplement (PMC10045854)
Supplement: 12889_2023_15422_MOESM1_ESM.pdf [file 12889_2023_15422_MOESM1_ESM.pdf]

**Table S1: Preferred Reporting Items for Systematic reviews and Meta-Analyses extension for Scoping Reviews (PRISMA-ScR) Checklist**

| SECTION                                              | ITEM | PRISMA-ScR CHECKLIST ITEM                                                                                                                                                                                                                                                                                  | REPORTED ON PAGE #                                         |
|------------------------------------------------------|------|------------------------------------------------------------------------------------------------------------------------------------------------------------------------------------------------------------------------------------------------------------------------------------------------------------|------------------------------------------------------------|
| <b>TITLE</b>                                         |      |                                                                                                                                                                                                                                                                                                            |                                                            |
| Title                                                | 1    | Identify the report as a scoping review.                                                                                                                                                                                                                                                                   | Title, page 1                                              |
| <b>ABSTRACT</b>                                      |      |                                                                                                                                                                                                                                                                                                            |                                                            |
| Structured summary                                   | 2    | Provide a structured summary that includes (as applicable): background, objectives, eligibility criteria, sources of evidence, charting methods, results, and conclusions that relate to the review questions and objectives.                                                                              | Abstract, page 3-4                                         |
| <b>INTRODUCTION</b>                                  |      |                                                                                                                                                                                                                                                                                                            |                                                            |
| Rationale                                            | 3    | Describe the rationale for the review in the context of what is already known. Explain why the review questions/objectives lend themselves to a scoping review approach.                                                                                                                                   | Introduction, page 5-6                                     |
| Objectives                                           | 4    | Provide an explicit statement of the questions and objectives being addressed with reference to their key elements (e.g., population or participants, concepts, and context) or other relevant key elements used to conceptualize the review questions and/or objectives.                                  | Introduction final paragraph, page 6                       |
| <b>METHODS</b>                                       |      |                                                                                                                                                                                                                                                                                                            |                                                            |
| Protocol and registration                            | 5    | Indicate whether a review protocol exists; state if and where it can be accessed (e.g., a Web address); and if available, provide registration information, including the registration number.                                                                                                             | Methods, paragraph 1 (there is no review protocol), page 6 |
| Eligibility criteria                                 | 6    | Specify characteristics of the sources of evidence used as eligibility criteria (e.g., years considered, language, and publication status), and provide a rationale.                                                                                                                                       | Methods, page 7                                            |
| Information sources                                  | 7    | Describe all information sources in the search (e.g., databases with dates of coverage and contact with authors to identify additional sources), as well as the date the most recent search was executed.                                                                                                  | Supplement 2                                               |
| Search                                               | 8    | Present the full electronic search strategy for at least 1 database, including any limits used, such that it could be repeated.                                                                                                                                                                            | Supplement 2                                               |
| Selection of sources of evidence                     | 9    | State the process for selecting sources of evidence (i.e., screening and eligibility) included in the scoping review.                                                                                                                                                                                      | Methods, page 7                                            |
| Data charting process                                | 10   | Describe the methods of charting data from the included sources of evidence (e.g., calibrated forms or forms that have been tested by the team before their use, and whether data charting was done independently or in duplicate) and any processes for obtaining and confirming data from investigators. | Methods, page 7-8                                          |
| Data items                                           | 11   | List and define all variables for which data were sought and any assumptions and simplifications made.                                                                                                                                                                                                     | Methods, page 7-8                                          |
| Critical appraisal of individual sources of evidence | 12   | If done, provide a rationale for conducting a critical appraisal of included sources of evidence; describe the methods used and how this information was used in any data synthesis (if appropriate).                                                                                                      | Methods, page 8                                            |
| Synthesis of results                                 | 13   | Describe the methods of handling and summarizing the data that were charted.                                                                                                                                                                                                                               | Methods, page 7-8                                          |
| <b>RESULTS</b>                                       |      |                                                                                                                                                                                                                                                                                                            |                                                            |
| Selection of sources of evidence                     | 14   | Give numbers of sources of evidence screened, assessed for eligibility, and included in the review, with reasons for exclusions at each stage, ideally using a flow diagram.                                                                                                                               | Results paragraph 1 page 8, Figure 1                       |
| Characteristics of sources of evidence               | 15   | For each source of evidence, present characteristics for which data were charted and provide the citations.                                                                                                                                                                                                | Table 1                                                    |
| Critical appraisal within sources of evidence        | 16   | If done, present data on critical appraisal of included sources of evidence (see item 12).                                                                                                                                                                                                                 | Table 4                                                    |

| <b>SECTION</b>                            | <b>ITEM</b> | <b>PRISMA-ScR CHECKLIST ITEM</b>                                                                                                                                                                | <b>REPORTED ON PAGE #</b>          |
|-------------------------------------------|-------------|-------------------------------------------------------------------------------------------------------------------------------------------------------------------------------------------------|------------------------------------|
| Results of individual sources of evidence | 17          | For each included source of evidence, present the relevant data that were charted that relate to the review questions and objectives.                                                           | Table 1-4                          |
| Synthesis of results                      | 18          | Summarize and/or present the charting results as they relate to the review questions and objectives.                                                                                            | Results section, page 8-11         |
| <b>DISCUSSION</b>                         |             |                                                                                                                                                                                                 |                                    |
| Summary of evidence                       | 19          | Summarize the main results (including an overview of concepts, themes, and types of evidence available), link to the review questions and objectives, and consider the relevance to key groups. | Discussion paragraph 1, page 11-12 |
| Limitations                               | 20          | Discuss the limitations of the scoping review process.                                                                                                                                          | Discussion, page 14-15             |
| Conclusions                               | 21          | Provide a general interpretation of the results with respect to the review questions and objectives, as well as potential implications and/or next steps.                                       | Discussion, page 15                |
| <b>FUNDING</b>                            |             |                                                                                                                                                                                                 |                                    |
| Funding                                   | 22          | Describe sources of funding for the included sources of evidence, as well as sources of funding for the scoping review. Describe the role of the funders of the scoping review.                 | Funding section                    |

Abbreviations: JBI, Joanna Briggs Institute; PRISMA-ScR, Preferred Reporting Items for Systematic reviews and Meta-Analyses extension for Scoping Reviews.

Template form from Tricco et al. [25]

Note: page numbers are based on the submitted draft

**Table S2: Databases searched, search structure, and search terms**

**Summary by Source**

| Source                                  | Date Searched | Number of Results  |
|-----------------------------------------|---------------|--------------------|
| PubMed                                  | 3/3/2022      | 77                 |
| Scopus                                  | 3/3/2022      | 183                |
| SPORTDiscus                             | 3/3/2022      | 1                  |
| Global Health                           | 3/3/2022      | 22                 |
| WHO Global Index Medicus                | 3/3/2022      | 0                  |
| Cochrane Library                        | 3/3/2022      | 1 review, 2 trials |
| <b>Total (Including Duplicates)</b>     |               | <b>286</b>         |
| Duplicates Removed                      |               | 77                 |
| <b>Total (After Duplicates Removed)</b> |               | <b>209</b>         |

**Search Structure**

(Geographical terms connected with *OR*) **AND** (physical behavior terms connected with *OR*) **AND** (COVID-related terms connected with *OR*)

Filtered for 2020 and later

**Table:** *Geographical, physical behavior, and COVID-related search terms used*

| Geographical terms         | Physical behavior terms                   | COVID-related terms     |
|----------------------------|-------------------------------------------|-------------------------|
| "Saudi Arabia"             | "physical activit*"                       | "COVID*"                |
| "KSA"                      | "sedentar*"                               | "corona*"               |
| "Middle East"              | "physical behavior" "physical behaviour"  | "nCoV" "2019-nCoV"      |
| "Gulf Cooperation Council" | "inactivity"                              | "SARS-CoV-2"            |
| "GCC"                      | "aerobic activit*"                        | "2019nCoV"              |
|                            | "endurance activit*"                      | "HCoV-19"               |
|                            | "exercise"                                | "Pandemic*"             |
|                            | "resistance training"                     | "outbreak*" "lockdown*" |
|                            | "strength training"                       |                         |
|                            | "walking" "bicycling" "active transport*" |                         |
|                            | "lifestyle"                               |                         |

## Search Terms by Database

| Database                 | Query                                                                                                                                                                                                                                                                                                                                                                                                                                                                                                                                                                                                                                                                                                                                                                                                                                                                                                                                                                                                                                                                                                                                                                                                                                                                                                                                                                                          |
|--------------------------|------------------------------------------------------------------------------------------------------------------------------------------------------------------------------------------------------------------------------------------------------------------------------------------------------------------------------------------------------------------------------------------------------------------------------------------------------------------------------------------------------------------------------------------------------------------------------------------------------------------------------------------------------------------------------------------------------------------------------------------------------------------------------------------------------------------------------------------------------------------------------------------------------------------------------------------------------------------------------------------------------------------------------------------------------------------------------------------------------------------------------------------------------------------------------------------------------------------------------------------------------------------------------------------------------------------------------------------------------------------------------------------------|
| PubMed                   | ("Saudi Arabia"[Title/Abstract] OR "Middle East"[Title/Abstract] OR "Gulf Cooperation Council"[Title/Abstract] OR "GCC"[Title/Abstract] OR "KSA"[Title/Abstract]) AND ("physical activit*" [Title/Abstract] OR "sedentar*" [Title/Abstract] OR "physical behavior" [Title/Abstract] OR "physical behaviour" [Title/Abstract] OR "inactivity" [Title/Abstract] OR "aerobic activit*" [Title/Abstract] OR "endurance activit*" [Title/Abstract] OR "exercise" [Title/Abstract] OR "active transport*" [Title/Abstract] OR "resistance training" [Title/Abstract] OR "strength training" [Title/Abstract] OR "walking" [Title/Abstract] OR "bicycling" [Title/Abstract]) AND ("COVID*" [Title/Abstract] OR "nCoV" [Title/Abstract] OR "2019-nCoV" [Title/Abstract] OR "SARS-CoV-2" [Title/Abstract] OR "2019nCoV" [Title/Abstract] OR "HCoV-19" [Title/Abstract] OR "Coronavirus*" [Title/Abstract] OR "Pandemic*" [Title/Abstract] OR "Outbreak*" [Title/Abstract] OR "Lockdown*" [Title/Abstract] OR "coronavirinae" [Title/Abstract] OR "corona*" [Title/Abstract])                                                                                                                                                                                                                                                                                                                            |
| Scopus                   | TITLE-ABS-KEY("Saudi Arabia" OR "Middle East" OR "Gulf Cooperation Council" OR "GCC" OR "KSA") AND TITLE-ABS-KEY("physical activit*" OR "sedentar*" OR "physical behavior" OR "physical behaviour" OR "inactivity" OR "aerobic activit*" OR "endurance activit*" OR "exercise" OR "active transport*" OR "resistance training" OR "strength training" OR "walking" OR "bicycling") AND TITLE-ABS-KEY("COVID*" OR "nCoV" OR "2019-nCoV" OR "SARS-CoV-2" OR "2019nCoV" OR "HCoV-19" OR "Coronavirus*" OR "Pandemic*" OR "Outbreak*" OR "Lockdown*" OR "coronavirinae" OR "corona*")                                                                                                                                                                                                                                                                                                                                                                                                                                                                                                                                                                                                                                                                                                                                                                                                              |
| SPORTDiscus              | (TI "Saudi Arabia" OR AB "Saudi Arabia" OR TI "Middle East" OR AB "Middle East" OR TI "Gulf Cooperation Council" OR AB "Gulf Cooperation Council" OR TI "GCC" OR AB "GCC" OR TI "KSA" OR AB "KSA") AND (TI "physical activit*" OR AB "physical activit*" OR TI "sedentar*" OR AB "sedentar*" OR TI "physical behavior" OR AB "physical behavior" OR TI "physical behaviour" OR AB "physical behaviour" OR TI "inactivity" OR AB "inactivity" OR TI "aerobic activit*" OR AB "aerobic activit*" OR TI "endurance activit*" OR AB "endurance activit*" OR TI "exercise" OR AB "exercise" OR TI "active transport*" OR AB "active transport*" OR TI "resistance training" OR AB "resistance training" OR TI "strength training" OR AB "strength training" OR TI "walking" OR AB "walking" OR TI "bicycling" OR AB "bicycling" OR TI "lifestyle" OR AB "lifestyle") AND (TI "COVID*" OR AB "COVID*" OR TI "corona*" OR AB "corona*" OR TI "nCoV" OR AB "nCoV" OR TI "2019-nCoV" OR AB "2019-nCoV" OR TI "SARS-CoV-2" OR AB "SARS-CoV-2" OR TI "2019nCoV" OR AB "2019nCoV" OR TI "HCoV-19" OR AB "HCoV-19" OR TI "pandemic*" OR AB "pandemic*" OR TI "outbreak*" OR AB "outbreak*" OR TI "lockdown*" OR AB "lockdown*" OR TI "social distancing" OR AB "social distancing")                                                                                                                         |
| Global Health            | (TI "Saudi Arabia" OR AB "Saudi Arabia" OR TI "Middle East" OR AB "Middle East" OR TI "Gulf Cooperation Council" OR AB "Gulf Cooperation Council" OR TI "GCC" OR AB "GCC" OR TI "KSA" OR AB "KSA") AND (TI "physical activit*" OR AB "physical activit*" OR TI "sedentar*" OR AB "sedentar*" OR TI "physical behavior" OR AB "physical behavior" OR TI "physical behaviour" OR AB "physical behaviour" OR TI "inactivity" OR AB "inactivity" OR TI "aerobic activit*" OR AB "aerobic activit*" OR TI "endurance activit*" OR AB "endurance activit*" OR TI "exercise" OR AB "exercise" OR TI "active transport*" OR AB "active transport*" OR TI "resistance training" OR AB "resistance training" OR TI "strength training" OR AB "strength training" OR TI "walking" OR AB "walking" OR TI "bicycling" OR AB "bicycling" OR TI "lifestyle" OR AB "lifestyle") AND (TI "COVID*" OR AB "COVID*" OR TI "corona*" OR AB "corona*" OR TI "nCoV" OR AB "nCoV" OR TI "2019-nCoV" OR AB "2019-nCoV" OR TI "SARS-CoV-2" OR AB "SARS-CoV-2" OR TI "2019nCoV" OR AB "2019nCoV" OR TI "HCoV-19" OR AB "HCoV-19" OR TI "pandemic*" OR AB "pandemic*" OR TI "outbreak*" OR AB "outbreak*" OR TI "lockdown*" OR AB "lockdown*" OR TI "social distancing" OR AB "social distancing")                                                                                                                         |
| WHO Global Index Medicus | (ti:("Saudi Arabia") OR ab:("Saudi Arabia") OR ti:("Middle East") OR ab:("Middle East") OR ti:("Gulf Cooperation Council") OR ab:("Gulf Cooperation Council") OR ti:("GCC") OR ab:("GCC") OR ti:("KSA") OR ab:("KSA")) AND (ti:("physical activit*") OR ab:("physical activit*") OR ti:("sedentar*") OR ab:("sedentar*") OR ti:("physical behavior") OR ab:("physical behavior") OR ti:("physical behaviour") OR ab:("physical behaviour") OR ti:("inactivity") OR ab:("inactivity") OR ti:("aerobic activit*") OR ab:("aerobic activit*") OR ti:("endurance activit*") OR ab:("endurance activit*") OR ti:("exercise") OR ab:("exercise") OR ti:("active transport*") OR ab:("active transport*") OR ti:("resistance training") OR ab:("resistance training") OR ti:("strength training") OR ab:("strength training") OR ti:("walking") OR ab:("walking") OR ti:("bicycling") OR ab:("bicycling") OR ti:("lifestyle") OR ab:("lifestyle")) AND (ti:("COVID*") OR ab:("COVID*") OR ti:("corona*") OR ab:("corona*") OR ti:("nCoV") OR ab:("nCoV") OR ti:("2019-nCoV") OR ab:("2019-nCoV") OR ti:("SARS-CoV-2") OR ab:("SARS-CoV-2") OR ti:("2019nCoV") OR ab:("2019nCoV") OR ti:("HCoV-19") OR ab:("HCoV-19") OR ti:("pandemic*") OR ab:("pandemic*") OR ti:("outbreak*") OR ab:("outbreak*") OR ti:("lockdown*") OR ab:("lockdown*") OR ti:("social distancing") OR ab:("social distancing")) |
| Cochrane Library         | ((("Saudi Arabia"):ti,ab OR ("Middle East"):ti,ab OR ("Gulf Cooperation Council"):ti,ab OR ("GCC"):ti,ab OR ("KSA"):ti,ab) AND ((("physical activit*"):ti,ab OR ("sedentar*"):ti,ab OR ("physical behavior"):ti,ab OR ("physical behaviour"):ti,ab OR ("inactivity"):ti,ab OR ("aerobic activit*"):ti,ab OR ("endurance activit*"):ti,ab OR ("exercise"):ti,ab OR ("active transport*"):ti,ab OR ("resistance training"):ti,ab OR ("strength training"):ti,ab OR ("walking"):ti,ab OR ("bicycling"):ti,ab OR ("lifestyle"):ti,ab) AND ((("COVID*"):ti,ab OR ("corona*"):ti,ab OR ("nCoV"):ti,ab OR ("2019-nCoV"):ti,ab OR ("SARS-CoV-2"):ti,ab OR ("2019nCoV"):ti,ab OR ("HCoV-19"):ti,ab OR ("pandemic*"):ti,ab OR ("outbreak*"):ti,ab OR ("lockdown*"):ti,ab OR ("social distancing"):ti,ab)                                                                                                                                                                                                                                                                                                                                                                                                                                                                                                                                                                                                 |

**Table S3: Quality assessment tool applied to each included study**

| Question                                                                                                                                                         |
|------------------------------------------------------------------------------------------------------------------------------------------------------------------|
| 1. Was the sample frame appropriate to address the target population?                                                                                            |
| 2. Were study participants sampled in an appropriate way? (e.g., not convenience sampling)                                                                       |
| 3. Was the sample size justified and was any estimated sample size requirement achieved?                                                                         |
| 4. Was the response rate adequate, and if not, was the low response rate managed appropriately?                                                                  |
| 5. Was the data analysis conducted with sufficient coverage of the identified sample?                                                                            |
| 6. Were the study participants and the setting described in detail? (Age, gender, some measure of socioeconomic status such as income, occupation, or education) |
| 7. Were valid methods used for the assessment of volume of physical activity/sedentary behavior?                                                                 |
| 8. Was physical behavior measured in a standard way for all participants?                                                                                        |
| 9. Was physical behavior measured at least once before and once during/after lockdown?                                                                           |
| 10. Was physical behavior summarized using appropriate analytic methods, including scoring?                                                                      |

All questions were used with or without edits from the Joanna Briggs Institute (JBI) tool detailed in Munn et al. [26]. The exception was question #8 that was added by the authors.

Response options: Yes, No, Unclear
